# Supplementary material for: Natal Origin and Age-Specific Egress of Pacific Bluefin Tuna From Coastal Nurseries Revealed With Geochemical Markers
Source: Research Square preprint supplement (doi:10.21203/rs.3.rs-199680/v1), 2021-02-17
Supplement: Supplementary file 2 [file 7a3c7ce7c2947742fa763cd0.docx]

**Natal origin and age-specific egress of Pacific bluefin tuna from coastal nurseries revealed with geochemical markers**

Jay R. Rooker1,2*, R. J. David Wells1,2, Barbara A. Block3, Hui Liu1, Hannes Baumann4, Wei-Chuan Chiang5,Michelle Sluis Zapp1, Nathaniel R. Miller6, John A. Mohan1, Seiji Ohshimo7, Yosuke Tanaka8, Michael A. Dance9, Heidi Dewar10, Owyn E. Snodgrass10, Jen-Chieh Shiao11

1Department of Marine Biology, Texas A&M University at Galveston, 1001 Texas Clipper Road, Galveston, TX 77553, USA

2Department of Ecology and Conservation Biology, Texas A&M University, College Station, TX 77843-2258

3Hopkins Marine Station, Stanford University, 120 Oceanview Boulevard, Pacific Grove, CA 93950 USA

4Department of Marine Sciences, University of Connecticut, 1080 Shennecossett Road, Groton, CT 06340-6048, USA

5Council of Agriculture, Fisheries Research Institute, 199 Hou-Ih Road, Keelung, 20246, Taiwan

6Jackson School of Geosciences, The University of Texas at Austin, 2275 Speedway Stop C9000, Austin, TX 78712, USA

7Pelagic Fish Resources Division, Fisheries Stock Assessment Center,  Fisheries Resources Institute, Japan Fisheries Research and Education Agency 1551-8, Taira-machi, Nagasaki, 851-2213 Japan

8Highly Migratory Resources Division, Fisheries Stock Assessment Center, Fisheries Resources Institute, Japan Fisheries Research and Education Agency 5-7-1, Orido, Shimizu, Shizuoka, 424-8633, Japan

9Department of Oceanography and Coastal Sciences, Louisiana State University, 2255 Energy, Coast and Environment Building Baton Rouge, Louisiana 70803, USA

10Southwest Fisheries Science Center, National Marine Fisheries Service, 8901 La Jolla Shores Drive, La Jolla, CA 92037, USA

11Institute of Oceanography, National Taiwan University, Taipei, No. 1, Sec. 4, Roosevelt Rd, Taipei 10617, Taiwan

**Table S1**. Summary statistics of age-0 and adult Pacific bluefin tuna (PBT) analyzed from the East China Sea and Sea of Japan. Sample size (N), collection year and month(s), mean fork length (cm FL ± 1 SD) shown.

| **Age Class** | **Location** | **N** | **Year** | **Month** | **Mean FL (cm)** | **1 SD** |
| --- | --- | --- | --- | --- | --- | --- |
| Age-0 | East China Sea | 10 | 2011 | Nov | 42.5 | 6.3 |
| Age-0 | East China Sea | 10 | 2012 | Nov-Dec | 45.5 | 1.9 |
| Age-0 | Sea of Japan | 10 | 2011 | Sep-Oct | 27.8 | 1.5 |
| Age-0 | Sea of Japan | 10 | 2012 | Jun-Oct | 32.6 | 6.6 |
|  |  |  |  |  |  |  |
| Adult | East China Sea | 56 | 2017 | May-Jun | 227.9 | 21.2 |

**Table S2**. Summary statistics for the 56 adult Pacific bluefin tuna used to develop geochemical chronologies for changepoint analysis. Collection date, length (cm FL), weight (kg), latitude and longitude of capture location, and gender shown.

| **Otolith number** | **Date** | **Length (cm)** | **Weight (kg)** | **Lat** | **Long** | **Gender** |
| --- | --- | --- | --- | --- | --- | --- |
| 2017-SO-008 | 5/1/17 | 244.0 | 287.0 | 25.10 | 123.29 | F |
| 2017-SO-019 | 5/5/17 | 229.0 | 224.0 | 25.12 | 123.57 | M |
| 2017-SO-027 | 5/6/17 | 202.0 | 149.0 | 24.56 | 123.27 | F |
| 2017-SO-036 | 5/8/17 | 226.0 | 246.0 | 25.18 | 124.24 | F |
| 2017-SO-078 | 5/13/17 | 273.0 | 388.0 | 25.40 | 125.39 | F |
| 2017-SO-093 | 5/15/17 | 201.0 | 157.0 | 25.42 | 125.20 | M |
| 2017-SO-103 | 5/16/17 | 244.0 | 265.0 | 25.44 | 125.28 | F |
| 2017-SO-140 | 5/17/17 | 208.0 | 168.0 | 25.40 | 125.22 | F |
| 2017-SO-182 | 5/22/17 | 179.0 | 112.0 | 23.52 | 122.48 | F |
| 2017-SO-193 | 5/24/17 | 220.0 | 182.0 | 25.70 | 123.49 | F |
| 2017-SO-196 | 5/25/17 | 197.0 | 141.0 | 25.21 | 124.70 | F |
| 2017-SO-197 | 5/25/17 | 217.0 | 190.0 | 25.50 | 125.90 | M |
| 2017-SO-199 | 5/25/17 | 203.0 | 192.0 | 25.24 | 124.33 | F |
| 2017-SO-200 | 5/25/17 | 212.0 | 172.0 | 25.30 | 123.41 | F |
| 2017-SO-205 | 5/26/17 | 230.0 | 195.0 | 25.19 | 124.10 | F |
| 2017-SO-206 | 5/26/17 | 223.0 | 175.0 | 25.37 | 124.48 | F |
| 2017-SO-209 | 5/26/17 | 243.0 | 338.0 | 25.34 | 124.53 | M |
| 2017-SO-210 | 5/26/17 | 209.0 | 194.0 | 25.35 | 124.53 | F |
| 2017-SO-211 | 5/26/17 | 202.0 | 178.0 | 25.30 | 124.56 | F |
| 2017-SO-213 | 5/27/17 | 214.0 | 181.0 | 24.59 | 123.51 | F |
| 2017-SO-214 | 5/27/17 | 241.0 | 240.0 | 24.59 | 123.51 | M |
| 2017-SO-215 | 5/27/17 | 213.0 | 166.0 | 25.40 | 123.60 | F |
| 2017-SO-216 | 5/27/17 | 233.0 | 241.0 | 23.23 | 122.13 | F |
| 2017-SO-218 | 5/29/17 | 226.0 | 185.0 | 25.30 | 124.48 | F |
| 2017-SO-220 | 5/29/17 | 254.0 | 301.0 | 25.30 | 123.44 | F |
| 2017-SO-221 | 5/29/17 | 214.0 | 182.0 | 25.29 | 125.70 | M |
| 2017-SO-226 | 5/29/17 | 221.0 | 184.0 | 25.27 | 124.36 | F |
| 2017-SO-227 | 5/29/17 | 一 | 231.0 | 25.00 | 123.40 | F |
| 2017-SO-228 | 5/29/17 | 213.0 | 206.0 | 24.57 | 123.40 | M |
| 2017-SO-229 | 5/29/17 | 213.0 | 191.0 | 25.32 | 125.80 | F |
| 2017-SO-230 | 5/29/17 | 236.0 | 268.0 | 23.00 | 122.00 | M |
| 2017-SO-233 | 6/1/17 | 205.0 | 162.0 | 25.45 | 125.47 | F |
| 2017-SO-235 | 6/1/17 | 214.0 | 200.0 | 25.13 | 123.30 | F |
| 2017-SO-241 | 6/1/17 | 210.0 | 172.0 | 24.58 | 123.40 | F |
| 2017-SO-244 | 6/1/17 | 201.0 | 149.0 | 25.80 | 123.41 | F |
| 2017-SO-245 | 6/1/17 | 215.0 | 167.0 | 24.54 | 123.15 | F |
| 2017-SO-246 | 6/1/17 | 220.0 | 170.0 | 25.50 | 123.42 | F |
| 2017-SO-248 | 6/1/17 | 216.0 | 226.0 | 25.11 | 123.50 | M |
| 2017-SO-249 | 6/1/17 | 212.0 | 172.0 | 24.58 | 123.80 | F |
| 2017-SO-264 | 6/2/17 | 263.0 | 348.0 | 25.28 | 124.43 | M |
| 2017-SO-271 | 6/2/17 | 251.0 | 325.0 | 25.27 | 124.42 | M |
| 2017-SO-304 | 6/6/17 | 222.0 | 198.0 | 25.42 | 125.41 | M |
| 2017-SO-324 | 6/7/17 | 246.0 | 306.0 | 25.42 | 125.55 | F |
| 2017-SO-326 | 6/7/17 | 210.0 | 176.0 | 25.31 | 125.70 | M |
| 2017-SO-337 | 6/8/17 | 255.0 | 370.0 | 25.46 | 125.52 | M |
| 2017-SO-350 | 6/8/17 | 247.0 | 309.0 | 25.43 | 125.49 | M |
| 2017-SO-356 | 6/10/17 | 253.0 | 323.0 | 25.14 | 124.22 | M |
| 2017-SO-357 | 6/10/17 | 266.0 | 330.0 | 25.14 | 124.22 | M |
| 2017-SO-383 | 6/13/17 | 230.0 | 238.0 | 25.29 | 125.30 | F |
| 2017-SO-386 | 6/14/17 | 256.0 | 308.0 | 25.37 | 124.20 | F |
| 2017-SO-401 | 6/15/17 | 241.0 | 256.0 | 25.40 | 125.45 | F |
| 2017-SO-405 | 6/15/17 | 252.0 | 340.0 | 25.55 | 125.46 | M |
| 2017-SO-455 | 6/20/17 | 246.0 | 264.0 | 25.45 | 125.00 | F |
| 2017-SO-463 | 6/20/17 | 247.0 | 282.0 | 25.47 | 125.41 | F |
| 2017-SO-465 | 6/22/17 | 253.0 | 296.0 | 25.48 | 125.19 | M |
| 2017-SO-470 | 6/23/17 | 264.0 | 306.0 | 25.41 | 125.45 | M |
